# Supplementary material for: Head-to-head performance comparison of self-collected nasal versus professional-collected nasopharyngeal swab for a WHO-listed SARS-CoV-2 antigen-detecting rapid diagnostic test
Source: bioRxiv or medRxiv preprint supplement (doi:10.1101/2021.03.17.21253076), 2021-03-24
Supplement: Supplementary file [file media-1.pdf]

# Supplementary Material

## Table of content

- (A) **Table 1: Study Team** ..... 2
- (B) **Figure 1: Study Flow** ..... 3
- (C) **Table 2: Detailed list of symptoms for all PCR positive participants**..... 4
- (D) **Table 3: Sensitivity and Specificity overall and by subgroups**..... 6
- (E) **Table 4: Ag-RDT – RT-PCR discrepant analysis: Buffer solution RT-PCR-results of Ag-RDT false-positive and Ag-RDT false-negative retained samples** ..... 7

**(A) Table 1: Study Team**

|                                                                                               |                      |
|-----------------------------------------------------------------------------------------------|----------------------|
| Public Health Authority, Rhein-Neckar-Region, Heidelberg, Germany                             | Dr. K. Assaad,       |
|                                                                                               | Dr. A. Fuhs          |
|                                                                                               | Dr. C. Harter        |
|                                                                                               | C. Schulze           |
|                                                                                               | G. Schmitt           |
| Division of Clinical Tropical Medicine, Heidelberg University Hospital,<br>Heidelberg Germany | Loai Abutaima        |
|                                                                                               | Rico Müller          |
|                                                                                               | Martina Fink         |
|                                                                                               | Mathilde Fougereau   |
|                                                                                               | Maximilian Schirmer  |
|                                                                                               | Annika Small         |
|                                                                                               | Matthias Meinschmidt |
|                                                                                               | Valerie Dürr         |
|                                                                                               | Alina Schuckert      |
|                                                                                               | Ann-Kathrin Backes   |
|                                                                                               | Salome Steinke       |
|                                                                                               | Henrik Ellinghaus    |
|                                                                                               | Magdalena Mikula     |
|                                                                                               | Nele Schäfer         |

**(B) Figure 1: Study Flow**

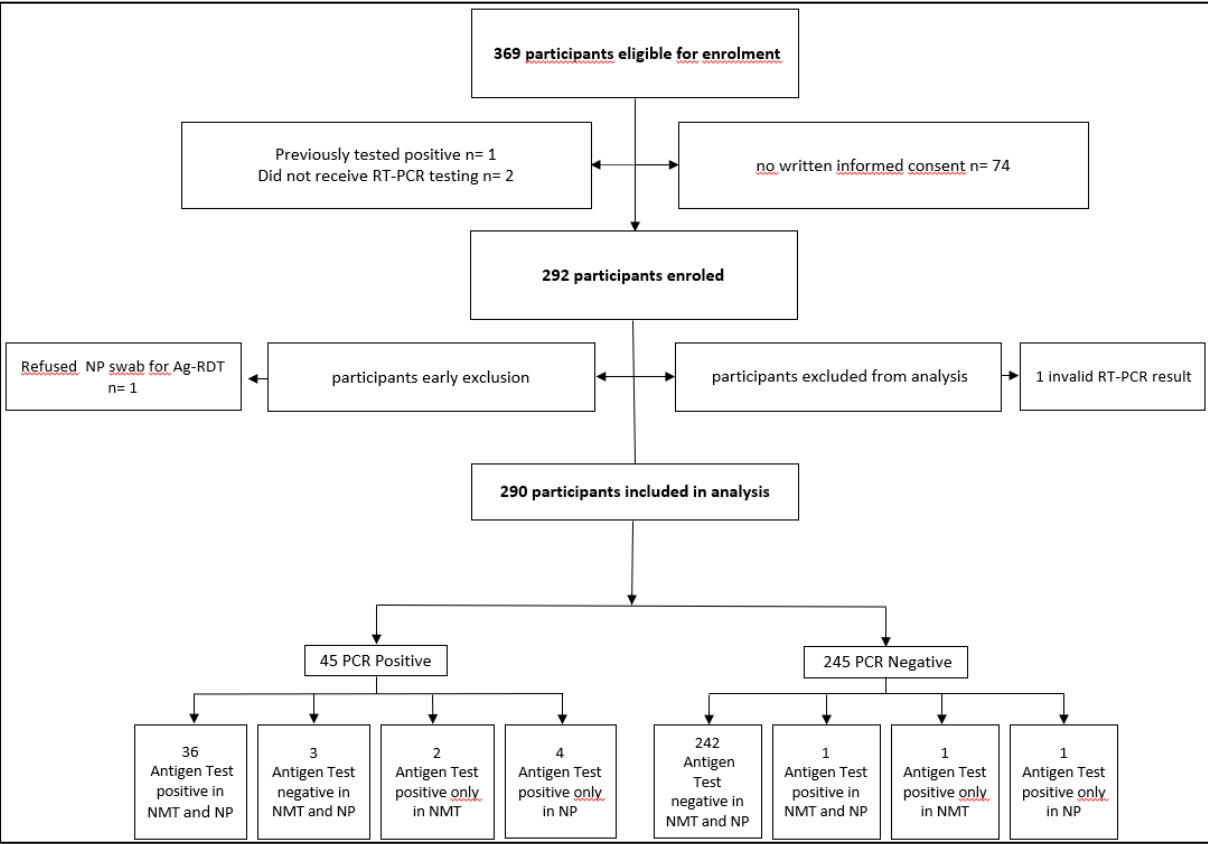

**(C) Table 2: Detailed list of symptoms for all PCR positive participants**

| CT value: E-Gene | Viral load (log <sub>10</sub> RNA copies/mL) | Result Ag-RDT NMT swab | Result Ag-RDT NP swab | Increased temperature/fever | Cough | Productive Cough | Sore throat | Dyspnoea | Body aches/muscle pain | Fatigue | Headache | Runny nose | Chest pain | Diarrhea | Nausea / Vomitus | Loss of taste/ smell | Other symptoms |
|------------------|----------------------------------------------|------------------------|-----------------------|-----------------------------|-------|------------------|-------------|----------|------------------------|---------|----------|------------|------------|----------|------------------|----------------------|----------------|
| 13.1             | 9.9                                          | positive               | positive              | No                          | Yes   | No               | No          | No       | Yes                    | Yes     | Yes      | No         | No         | No       | No               | No                   | Yes            |
| 25.7             | 6.2                                          | positive               | positive              | No                          | Yes   | No               | No          | No       | Yes                    | Yes     | Yes      | No         | No         | Yes      | No               | No                   | No             |
| 22.6             | 7.1                                          | positive               | positive              | Yes                         | Yes   | No               | Yes         | No       | Yes                    | Yes     | Yes      | No         | Yes        | No       | No               | Yes                  | No             |
| 31.2             | 4.5                                          | positive               | negative              | No                          | No    | No               | Yes         | No       | Yes                    | Yes     | Yes      | No         | No         | No       | No               | No                   | No             |
| 26.0             | 6.1                                          | positive               | positive              | No                          | No    | No               | No          | No       | No                     | No      | Yes      | Yes        | No         | No       | No               | Yes                  | No             |
| 22.1             | 7.2                                          | negative               | positive              | Yes                         | Yes   | No               | Yes         | No       | Yes                    | Yes     | Yes      | No         | No         | Yes      | Yes              | No                   |                |
| 23.1             | 6.9                                          | positive               | positive              |                             |       |                  |             |          |                        |         |          |            |            |          |                  |                      |                |
| 26.7             | 5.9                                          | positive               | positive              | No                          | No    | No               | No          | No       | No                     | No      | No       | No         | No         | No       | No               | Yes                  | No             |
| 16.1             | 9.0                                          | positive               | positive              | No                          | Yes   | Yes              | Yes         | No       | Yes                    | Yes     | No       | Yes        | No         | No       | No               | No                   | No             |
| 16.5             | 8.9                                          | positive               | positive              | Yes                         | Yes   | No               | Yes         |          | No                     | Yes     | Yes      | No         | No         | No       | No               | No                   | No             |
| 19.7             | 7.9                                          | positive               | positive              | No                          | No    | No               | Yes         | No       | No                     | Yes     | Yes      | No         | No         | No       | No               | No                   | No             |
| 26.7             | 5.9                                          | negative               | negative              | No                          | No    | No               | No          | No       | No                     | No      | Yes      | No         | No         | No       | No               | No                   | No             |
| 16.6             | 8.9                                          | positive               | positive              | Yes                         | No    | No               | No          | No       | No                     | No      | Yes      | No         | No         | No       | No               |                      | No             |
| 18.9             | 8.2                                          | positive               | negative              | No                          | No    | No               | No          | No       | No                     | No      | No       | Yes        | No         | No       | No               | No                   | Yes            |
| 23.8             | 6.7                                          | positive               | positive              | No                          | No    | No               | No          | No       | Yes                    | Yes     | No       | Yes        |            | No       | No               | Yes                  | No             |
| 16.7             | 8.8                                          | positive               | positive              | No                          | Yes   | No               | Yes         | No       | Yes                    | Yes     | Yes      | No         | Yes        | No       | No               | No                   | No             |
| 17.8             | 8.5                                          | positive               | positive              | Yes                         | No    | No               | No          | No       | Yes                    | No      | No       | No         | No         | No       | No               | No                   | No             |
| 20.1             | 7.8                                          | positive               | positive              |                             |       |                  |             |          |                        |         |          |            |            |          |                  |                      |                |
| 16.4             | 8.9                                          | positive               | positive              | No                          | Yes   |                  | Yes         | No       | No                     | Yes     | Yes      | No         | No         | No       | No               | No                   | No             |
| 30.6             | 4.7                                          | negative               | negative              |                             |       |                  |             |          |                        |         |          |            |            |          |                  |                      |                |
| 17.9             | 8.5                                          | positive               | positive              | Yes                         | No    | No               | No          | No       | Yes                    | Yes     | Yes      | No         | No         | No       | No               | No                   | No             |
| 21.2             | 7.5                                          | positive               | positive              | Yes                         | No    | Yes              | Yes         | No       | Yes                    | Yes     | Yes      | No         | Yes        | No       | No               | No                   | Yes            |
| 18.8             | 8.2                                          | positive               | positive              | Yes                         | No    | No               | Yes         | No       | Yes                    | Yes     | Yes      | Yes        | No         | No       | No               | No                   | No             |
| 27.7             | 5.6                                          | positive               | positive              | Yes                         | Yes   | Yes              | No          | No       | Yes                    | Yes     | Yes      | No         | No         | No       | No               | Yes                  | No             |
| 12.7             | 10.0                                         | positive               | positive              | No                          | Yes   | Yes              | No          | No       | No                     | Yes     | Yes      | Yes        | No         | No       | No               | No                   | No             |
| 16.5             | 8.9                                          | positive               | positive              | No                          | Yes   | Yes              | No          | No       | Yes                    | No      | Yes      | Yes        | No         | Yes      | No               | No                   | No             |
| 33.8             | 3.8                                          | negative               | positive              |                             |       |                  |             |          |                        |         |          |            |            |          |                  |                      |                |
| 22.5             | 7.1                                          | positive               | positive              | No                          | No    | No               | No          | No       | Yes                    | No      | Yes      | No         | No         | No       | No               | Yes                  | No             |

| CT value: E-Gene | Viral load (log <sub>10</sub> RNA copies/mL) | Result Ag-RDT NMT swab | Result Ag-RDT NP swab | Increased temperature/fever | Cough | Productive Cough | Sore throat | Dyspnoe | Body aches/muscle pain | Fatigue | Headache | Runny nose | Chest pain | Diarrhea | Nausea / Vomitus | Loss of taste/ smell | Other symptoms |
|------------------|----------------------------------------------|------------------------|-----------------------|-----------------------------|-------|------------------|-------------|---------|------------------------|---------|----------|------------|------------|----------|------------------|----------------------|----------------|
| 12.9             | 9.9                                          | positive               | positive              | Yes                         | Yes   | Yes              | Yes         | No      | No                     | Yes     | No       | Yes        | No         | No       | No               | No                   | No             |
| 25.9             | 6.1                                          | positive               | positive              | Yes                         | Yes   | Yes              | No          | No      | Yes                    | Yes     | Yes      | Yes        | No         | No       | No               | No                   | No             |
| 18.8             | 8.2                                          | positive               | positive              | Yes                         | No    | No               | No          | No      | Yes                    | Yes     | Yes      | No         | No         | No       | No               | No                   | Yes            |
| 23.6             | 6.8                                          | positive               | positive              |                             | Yes   | No               | Yes         | No      | Yes                    | Yes     | Yes      | Yes        | No         | No       | No               | No                   | Yes            |
| 34.5             | 3.6                                          | negative               | negative              | No                          | Yes   | No               | No          | No      | No                     | No      | No       | Yes        | No         | No       | No               | No                   | No             |
| 19.9             | 7.9                                          | positive               | positive              | No                          | Yes   | No               | Yes         | No      | No                     | Yes     | Yes      | No         | No         | Yes      | No               | Yes                  | No             |
| 23.1             | 6.9                                          | positive               | positive              | No                          | Yes   | Yes              | Yes         | No      | Yes                    | Yes     | Yes      | Yes        | No         | No       | Yes              | No                   | No             |
| 31.2             | 4.5                                          | positive               | positive              | No                          | No    | No               | No          | No      | No                     | Yes     | Yes      | Yes        | No         | Yes      | No               | Yes                  | No             |
| 21.4             | 7.4                                          | positive               | positive              |                             |       |                  |             |         |                        |         |          |            |            |          |                  |                      |                |
| 29.7             | 5.0                                          | negative               | positive              |                             |       |                  |             |         |                        |         |          |            |            |          |                  |                      |                |
| 22.8             | 7.0                                          | positive               | positive              | No                          | Yes   | No               | No          | No      | Yes                    | Yes     | Yes      | No         | Yes        | No       | No               | No                   | Yes            |
| 22.5             | 7.1                                          | positive               | positive              | Yes                         | Yes   | Yes              | No          | Yes     | No                     | Yes     | Yes      | No         | No         | No       | No               | No                   | No             |
| 19.9             | 7.9                                          | positive               | positive              |                             |       |                  |             |         |                        |         |          |            |            |          |                  |                      |                |
| 26.3             | 6.0                                          | positive               | positive              |                             |       |                  |             |         |                        |         |          |            |            |          |                  |                      |                |
| 32.7             | 4.1                                          | negative               | positive              | Yes                         | Yes   | No               | Yes         | Yes     | Yes                    | Yes     | Yes      | Yes        | Yes        | No       | No               | Yes                  | No             |
| 20.2             | 7.8                                          | positive               | positive              | Yes                         | Yes   | No               | No          | No      | Yes                    | Yes     | Yes      | Yes        | No         | No       | No               | No                   | Yes            |
| 19.5             | 8.0                                          | positive               | positive              | No                          | Yes   | No               | No          | No      | Yes                    | No      | Yes      | Yes        | No         | No       | No               | No                   | No             |

**(D) Table 3: Sensitivity and Specificity overall and by subgroups**

|                                                                               | Sampling technique | Sensitivity<br>(%; 95% CI)         | Specificity<br>(%; 95% CI)          | Positive Percent<br>Agreement        | Negative Percent<br>Agreement       |
|-------------------------------------------------------------------------------|--------------------|------------------------------------|-------------------------------------|--------------------------------------|-------------------------------------|
| <b>Overall</b>                                                                | NP                 | 40* / 45<br>(88.9%; 76.5% - 95.5%) | 243 / 245<br>(99.2%; 97.1% - 99.8%) | 37* / 42**<br>(88.1%; 75.0% - 94.8%) | 245 / 248<br>(98.8%; 96.5% - 99.6%) |
|                                                                               | NMT                | 38 / 45<br>(84.4%; 71.2% - 92.3%)  | 243 / 245<br>(99.2%; 97.1% - 99.8%) |                                      |                                     |
| <b>Viral load<br/>≥7 log<sub>10</sub><br/>SARS-CoV-2<br/>RNA copies/ml</b>    | NP                 | 26 / 27<br>(96.3%; 81.7% - 99.8%)  | n.a.                                | 25 / 26<br>(96.2%; 81.1% - 99.8%)    | n.a.                                |
|                                                                               | NMT                | 26 / 27<br>(96.3%; 81.7% - 99.8%)  | n.a.                                |                                      |                                     |
| <b>Viral load<br/>&lt;7 log<sub>10</sub><br/>SARS-CoV-2<br/>RNA copies/ml</b> | NP                 | 14 / 18<br>(77.8%; 54.8% - 90.1%)  | n.a.                                | 11 / 14<br>(78.6%; 52.4% - 92.4%)    | n.a.                                |
|                                                                               | NMT                | 12 / 18<br>(66.7%; 43.7% - 83.7%)  | n.a.                                |                                      |                                     |
| <b>symptomatic</b>                                                            | NP                 | 33/37<br>(89.2%, 75.3% - 95.7%)    | 94/96<br>(97.9%, 81.4% - 99.4%)     | 33 / 35<br>(91.4%, 77.6% - 97.0%)    | 96 / 98<br>(98.0%, 92.8% - 99.4%)   |
|                                                                               | NMT                | 33/37<br>(89.2%, 75.3% - 95.7%)    | 95/96<br>(99.0%, 94.3% - 99.9%)     |                                      |                                     |
| <b>asymptomatic</b>                                                           | NP                 | 7/8<br>(87.5%, 52.9% - 99.4%)      | 147/147<br>(100%, 97.5 - 100%)      | 5 / 7<br>(71.4%, 35.9% - 91.8%)      | 147 / 148<br>(99.3%, 96.3% - 100%)  |
|                                                                               | NMT                | 5/8<br>(62.5%, 30.6% - 86.3%)      | 146/147<br>(99.3%, 96.2% - 100%)    |                                      |                                     |

Abbreviations: n.a.: not applicable; NP: nasopharyngeal; NMT: nasal mid-turbinate; CI: confidence interval

\*\*including one false-positive in NMT and NP

\*\*including two false-positive in NP

**(E) Table 4: Ag-RDT – RT-PCR discrepant analysis: Buffer solution RT-PCR-results of Ag-RDT false-positive and Ag-RDT false-negative retained samples**

| Ag-RDT false-positives                                                                                                                                                               |                |          |             |                             |                             |                         |                       |                                     |                         |
|--------------------------------------------------------------------------------------------------------------------------------------------------------------------------------------|----------------|----------|-------------|-----------------------------|-----------------------------|-------------------------|-----------------------|-------------------------------------|-------------------------|
| Ag-RDT NMT swab                                                                                                                                                                      | Ag-RDT NP swab | RT-PCR   | Assay       | RT-PCR buffer NMT sample    | RT-PCR buffer NP sample     | Sampling comment        | Probe aspect          | Symptom duration (days)             |                         |
| positive                                                                                                                                                                             | negative       | negative | TibMolBiol  | negative                    | negative                    | none                    | NMT: mucous NP: clear | asymptomatic                        |                         |
| positive                                                                                                                                                                             | positive       | negative | TibMolBiol  | positive (Ct 27.3; VL* 6.3) | positive (Ct 31.8; VL* 5.0) | none                    | NMT: clear NP: mucous | 3                                   |                         |
| negative                                                                                                                                                                             | positive       | negative | TibMolBiol  | negative                    | negative                    | none                    | NMT: clear NP: mucous | 6                                   |                         |
| Ag-RDT false-negatives                                                                                                                                                               |                |          |             |                             |                             |                         |                       |                                     |                         |
| Ag-RDT NMT swab                                                                                                                                                                      | Ag-RDT NP swab | Ct-value | Viral load* | Assay                       | RT-PCR buffer NMT sample    | RT-PCR buffer NP sample | Sampling comment      | Probe aspect                        | Symptom duration (days) |
| negative                                                                                                                                                                             | positive       | 22.1     | 7.2         | TibMolBiol                  | sample got lost             | not tested              | none                  | NMT: clear NP:clear                 | 1                       |
| negative                                                                                                                                                                             | positive       | 29.7     | 5.0         | TibMolBiol                  | negative                    | not tested              | none                  | NMT: mucous NP:clear                | asymptomatic            |
| negative                                                                                                                                                                             | positive       | 32.7     | 4.1         | TibMolBiol                  | positive (Ct 33.7; VL* 4.4) | not tested              | none                  | NMT: mucous NP: mucous,bloody spots | n.a.                    |
| negative                                                                                                                                                                             | positive       | 33.8     | 3.8         | TibMolBiol                  | negative                    | not tested              | none                  | NMT: clear NP: mucous               | asymptomatic            |
| positive                                                                                                                                                                             | negative       | 18.9     | 8.2         | TibMolBiol                  | not tested                  | negative                | none                  | NMT: clear NP:clear                 | 1                       |
| positive                                                                                                                                                                             | negative       | 31.2     | 4.5         | TibMolBiol                  | not tested                  | sample got lost         | none                  | NMT: clear NP:clear                 | 1                       |
| Ct: cycle threshold; Ag-RDT: antigen-detecting rapid diagnostic test; NMT: nasal mid-turbinate; NP: nasopharyngeal. n.a.: not available; *log <sub>10</sub> SARS-CoV-2 RNA copies/ml |                |          |             |                             |                             |                         |                       |                                     |                         |
